# Supplementary material for: Association of Days Alive and at Home at Day 90 After Intensive Care Unit Admission With Long-term Survival and Functional Status Among Mechanically Ventilated Patients
Source: PubMed Central journal article supplement (PMC10020882; doi:10.1001/jamanetworkopen.2023.3265), 2023-03-16
Supplement: jamanetwopen-e233265-s001.pdf [file jamanetwopen-e233265-s001.pdf]

## Supplementary Online Content

Taran S, Coiffard B, Huszti E, et al. Association of days alive and at home at day 90 after intensive care unit admission with long-term survival and functional status among mechanically ventilated patients. *JAMA Netw Open*. 2023;6(3):e233265. doi:10.1001/jamanetworkopen.2023.3265

**eFigure 1.** Frequency Distributions for Days Alive and at Home at Day 90 (DAAH<sub>90</sub>) With or Without Including Length of Stay (LOS) in Long-term Care

**eFigure 2.** Distribution of Days Alive and at Home at Day 90 (DAAH<sub>90</sub>) According to Baseline Characteristics of the Study Population

**eTable 1.** Association of Measures of Burden of Critical Illness With Tertiles of Days Alive and at Home at Day 90

**eTable 2.** Baseline Characteristics of the 292 Patients in the Follow-up Cohort

**eFigure 3.** Distribution of Days Alive and at Home at Day 90 (DAAH<sub>90</sub>) According to Disability Risk Groups Defined in the RECOVER Study

**eTable 3.** Adjusted Association of Composite Metrics With Functional Independence Measure Score at 1 Year

**eTable 4.** Sensitivity Analysis Removing Long-Term Care Length of Stay at Day 90

**eTable 5.** Cox Proportional Hazards Regression Model for 1-Year Mortality

**eFigure 4.** Survival at 12 Months Among Survivors at Day 90 According to Tertiles of Days Alive and at Home at Day 90 Removing Long-Term Care Length of Stay

**eFigure 5.** Association of Deciles of Days Alive and at Home at Day 90 (DAAH<sub>90</sub>) With Functional Outcomes at 3 Months

**eFigure 6.** Mortality at 1 Year in Survivors at Day 90 According to Deciles of Days Alive and at Home at Day 90 (DAAH<sub>90</sub>)

This supplementary material has been provided by the authors to give readers additional information about their work.

**eFigure 1.** Frequency Distributions for Days Alive and at Home at Day 90 (DAAH<sub>90</sub>) With or Without Including Length of Stay (LOS) in Long-term Care

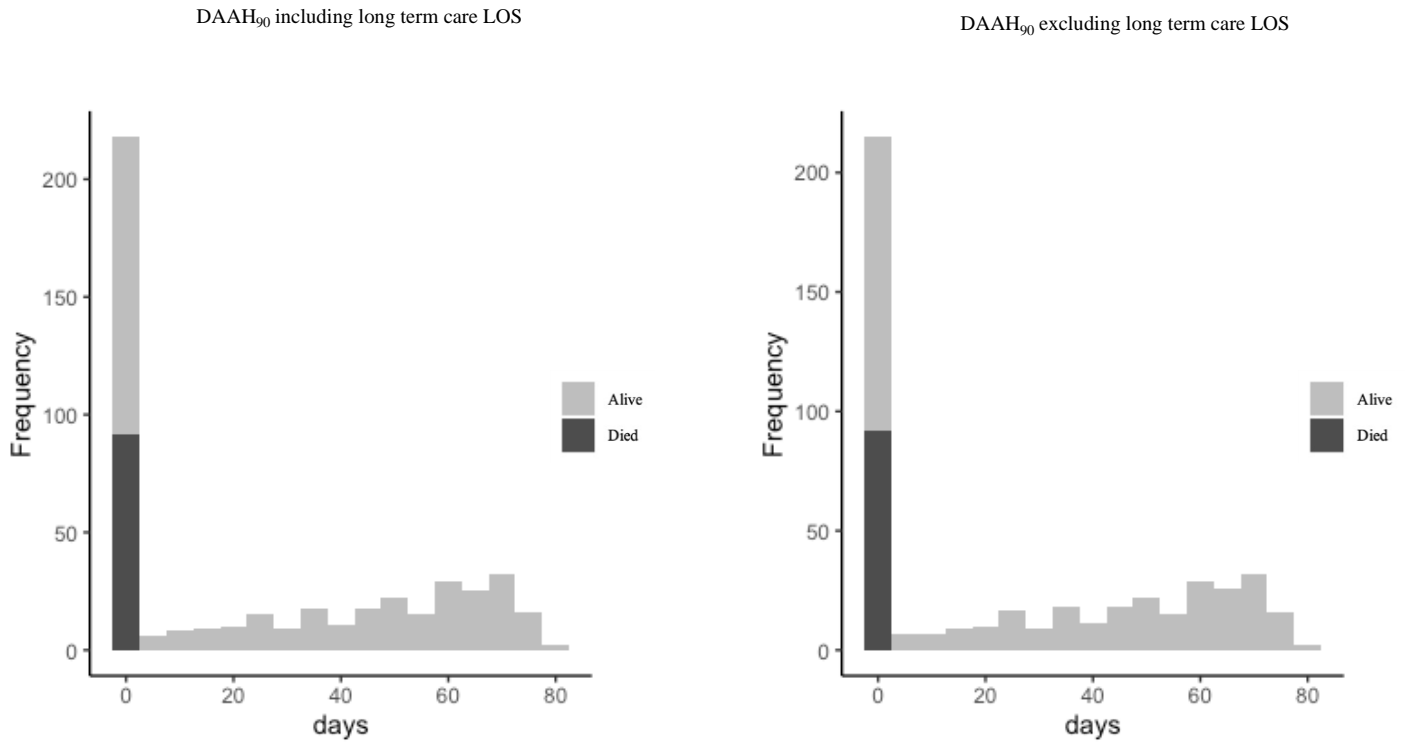

**eFigure 2.** Distribution of Days Alive and at Home at Day 90 (DAAH<sub>90</sub>) According to Baseline Characteristics of the Study Population

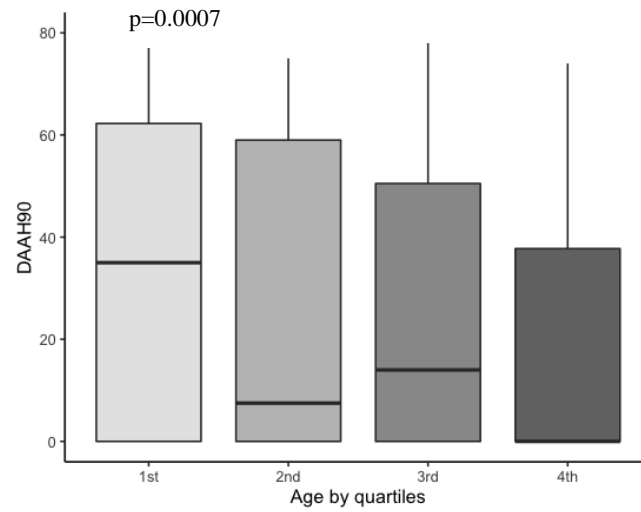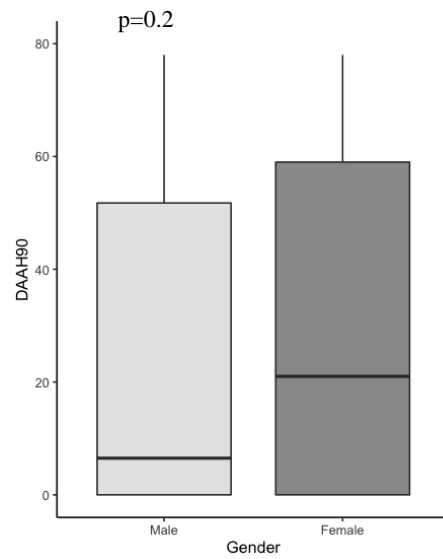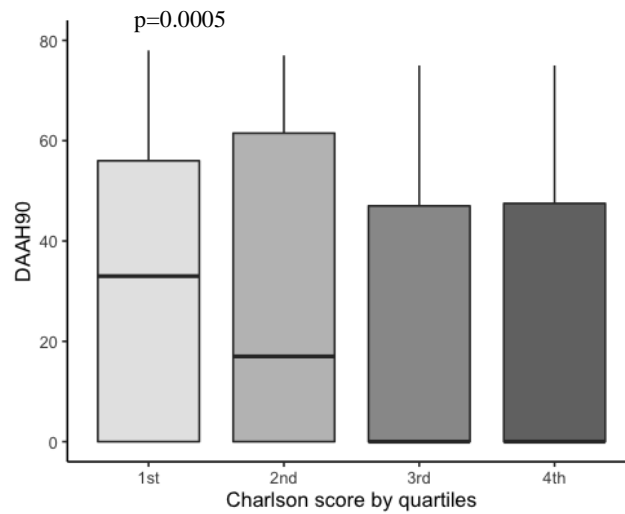

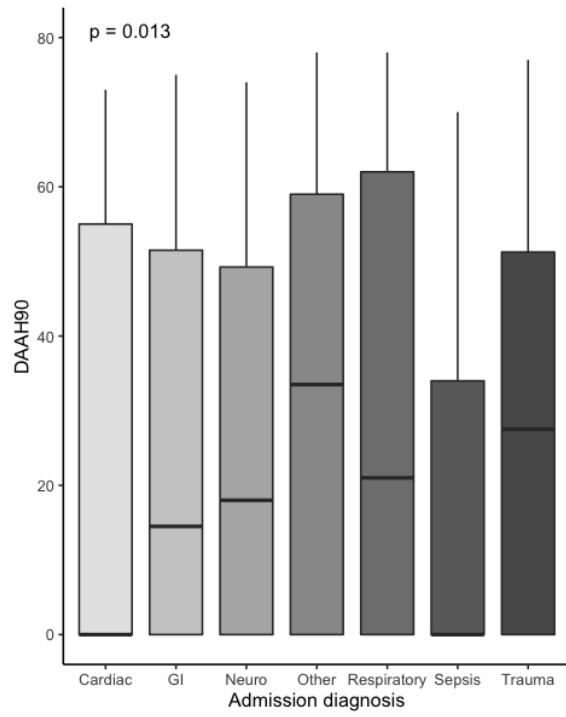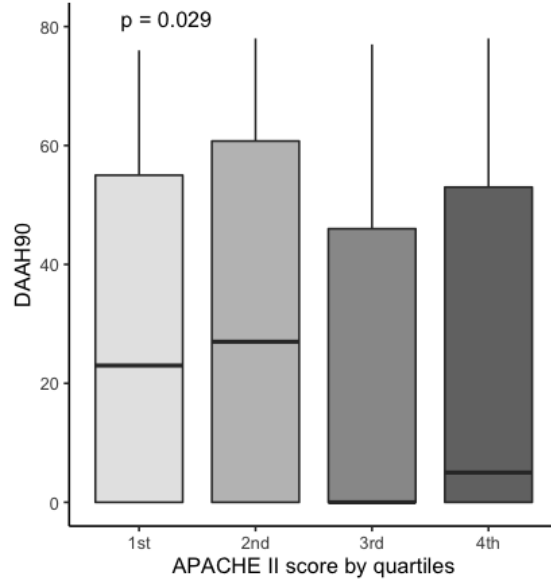

**eTable 1.** Association of Measures of Burden of Critical Illness With Tertiles of Days Alive and at Home at Day 90

|                                                           | Unadjusted proportional odds ratio<br>(odds ratio, 95% CI) | p-value | Adjusted proportional odds ratio*<br>(odds ratio, 95% CI) | p-value |
|-----------------------------------------------------------|------------------------------------------------------------|---------|-----------------------------------------------------------|---------|
| Duration of mechanical ventilation (days)                 | 0.95 (0.94 – 0.97)                                         | <0.0001 | 0.95 (0.93 – 0.96)                                        | <0.0001 |
| Intensive care unit length-of-stay among survivors (days) | 0.93 (0.92 – 0.950)                                        | <0.0001 | 0.92 (0.91 – 0.94)                                        | <0.0001 |
| Ventilator-free days at day 28 (days)                     | 1.13 (1.10 – 1.16)                                         | <0.0001 | 1.14 (1.10 – 1.17)                                        | <0.0001 |
| Intensive care unit-free days at day 28 (days)            | 1.14 (1.11 – 1.17)                                         | <0.0001 | 1.16 (1.12 – 1.20)                                        | <0.0001 |
| Tracheostomy                                              | 0.30 (0.21 – 0.42)                                         | <0.0001 | 0.31 (0.21 – 0.45)                                        | <0.0001 |
| Renal replacement therapy                                 | 0.26 (0.17 – 0.41)                                         | <0.0001 | 0.23 (0.14 – 0.38)                                        | <0.0001 |

\*Adjusted for age, sex, APACHE II score, and Charlson comorbidity index. Models were fitted using data from the entire baseline cohort.

**eTable 2. Baseline Characteristics of the 292 Patients in the Follow-up Cohort**

| Characteristic                             | Median [IQR]                                    |                                                 |                                                 | p-value |
|--------------------------------------------|-------------------------------------------------|-------------------------------------------------|-------------------------------------------------|---------|
|                                            | DAAH <sub>90</sub><br>(1 <sup>st</sup> tertile) | DAAH <sub>90</sub><br>(2 <sup>nd</sup> tertile) | DAAH <sub>90</sub><br>(3 <sup>rd</sup> tertile) |         |
| Number of patients, n                      | 98                                              | 97                                              | 97                                              |         |
| DAAH <sub>90</sub> (days), median [range]  | 0 [0–1]                                         | 30 [2–52]                                       | 65 [53–78]                                      |         |
| Age (years)                                | 58.5 [49.5–69.8]                                | 59.1 [47.9–66.1]                                | 53.6 [42.0–62.1]                                | 0.004   |
| Female sex, n (%)                          | 43 (43.9)                                       | 38 (39.2)                                       | 42 (43.3)                                       | 0.77    |
| BMI (kg/m <sup>2</sup> )                   | 27.2 [25.6–31.6]                                | 27.1 [24.4–31.6]                                | 28.7 [24.7–34.8]                                | 0.60    |
| Education level, n (%)                     |                                                 |                                                 |                                                 | 0.99    |
| Less than secondary                        | 19 (19.4)                                       | 20 (20.6)                                       | 21 (21.6)                                       |         |
| Secondary/some post-secondary              | 33 (33.7)                                       | 33 (34.0)                                       | 33 (34.0)                                       |         |
| Post-secondary                             | 46 (46.9)                                       | 44 (45.4)                                       | 43 (44.3)                                       |         |
| Prior Employment, n (%)                    |                                                 |                                                 |                                                 | 0.06    |
| Part/full time work                        | 45 (48.9)                                       | 47 (49.5)                                       | 48 (51.1)                                       |         |
| Retired                                    | 27 (29.3)                                       | 29 (30.5)                                       | 14 (14.9)                                       |         |
| Disability                                 | 9 (9.8)                                         | 9 (9.5)                                         | 10 (10.6)                                       |         |
| Other                                      | 11 (12.0)                                       | 10 (10.5)                                       | 22 (23.4)                                       |         |
| Income, n (%)                              |                                                 |                                                 |                                                 | 0.13    |
| <\$50,000                                  | 22 (23.9)                                       | 27 (28.4)                                       | 40 (42.6)                                       |         |
| \$50,000–70,000                            | 10 (10.9)                                       | 12 (12.6)                                       | 10 (10.6)                                       |         |
| >\$70,000\$                                | 26 (28.3)                                       | 28 (29.5)                                       | 24 (25.5)                                       |         |
| Not known                                  | 34 (37.0)                                       | 28 (29.5)                                       | 20 (21.3)                                       |         |
| Charlson comorbidity index                 | 1 [0–3]                                         | 1 [0–2]                                         | 1 [0–2]                                         | 0.48    |
| Admission diagnosis category, n (%)        |                                                 |                                                 |                                                 | 0.02    |
| Cardiac                                    | 8 (8.2)                                         | 7 (7.2)                                         | 11 (11.3)                                       |         |
| GI                                         | 14 (14.3)                                       | 12 (12.4)                                       | 13 (13.4)                                       |         |
| Neuro                                      | 24 (24.5)                                       | 16 (16.5)                                       | 11 (11.3)                                       |         |
| Respiratory                                | 18 (18.4)                                       | 29 (29.9)                                       | 36 (37.1)                                       |         |
| Sepsis                                     | 13 (13.3)                                       | 11 (11.3)                                       | 4 (4.1)                                         |         |
| Trauma                                     | 15 (15.3)                                       | 12 (12.4)                                       | 7 (7.2)                                         |         |
| Other                                      | 6 (6.1)                                         | 10 (10.3)                                       | 15 (15.5)                                       |         |
| APACHE II                                  | 22.5 [17–27]                                    | 21 [17–28]                                      | 22 [16–29]                                      | 0.79    |
| Lowest PaO <sub>2</sub> /FiO <sub>2</sub>  | 114.3 [74–154]                                  | 101 [77–168]                                    | 103 [75–141]                                    | 0.64    |
| Renal replacement therapy, n (%)           | 32 (32.7)                                       | 18 (18.6)                                       | 11 (11.3)                                       | 0.001   |
| Tracheostomy, n (%)                        | 66 (67.3)                                       | 43 (44.3)                                       | 21 (21.6)                                       | <0.001  |
| Duration of mechanical ventilation, days   | 24 [15–36]                                      | 19 [13–25]                                      | 11 [9–15]                                       | <0.001  |
| Ventilator-free days, days                 | 3 [0–13]                                        | 9 [2–16]                                        | 17 [14, 19]                                     | <0.001  |
| ICU length-of-stay, days                   | 29 [18–42]                                      | 22 [14–32]                                      | 13 [11–18]                                      | <0.001  |
| ICU-free days, days                        | 0 [0–10]                                        | 6 [0–14]                                        | 15 [10–17]                                      | <0.001  |
| Index hospitalization length-of-stay, days | 96 [66–152]                                     | 49 [40–65]                                      | 25 [20–31]                                      | <0.001  |

|                                                           |            |            |             |        |
|-----------------------------------------------------------|------------|------------|-------------|--------|
| Days in hospital for subsequent hospital admissions, days | 21 [0–46]  | 19 [6–31]  | 0 [0–5.75]  | <0.001 |
| Days in long-term care                                    | 0 [0–0]    | 0 [0–0]    | 0 [0–0]     | 0.08   |
| FIM score at day 7 after ICU discharge                    | 42 [28–55] | 51 [30–68] | 93 [80–110] | <0.001 |
| Total MRC                                                 | 38 [24–47] | 48 [42–54] | 54 [49–58]  | <0.001 |
| Disability risk groups <sup>a</sup>                       |            |            |             | <0.001 |
| Young, short LOS                                          | 0 (0.0)    | 3 (3.1)    | 5 (15.5)    |        |
| Mixed age, variable LOS                                   | 22 (22.4)  | 34 (35.1)  | 51 (52.6)   |        |
| Older, long LOS                                           | 45 (45.9)  | 37 (38.1)  | 28 (28.9)   |        |
| Oldest, long LOS                                          | 31 (31.6)  | 23 (23.7)  | 3 (3.1)     |        |
| Discharge disposition, n (%)                              |            |            |             | <0.001 |
| Acute/Chronic Care                                        | 24 (25.3)  | 6 (6.2)    | 11 (11.3)   |        |
| Home                                                      | 10 (10.5)  | 32 (33.0)  | 64 (66.0)   |        |
| Referring Hospital                                        | 16 (16.8)  | 15 (15.5)  | 12 (12.4)   |        |
| Rehabilitation                                            | 45 (47.4)  | 44 (45.4)  | 10 (10.3)   |        |
| Died in ICU                                               | 19 (100.0) | 13 (100.0) | 3 (100.0)   |        |
| Died in hospital                                          | 98 (100.0) | 97 (100.0) | 97 (100.0)  |        |
| One-year mortality, n (%)                                 | 11 (11.2)  | 5 (5.2)    | 1 (1.0)     | 0.009  |

<sup>a</sup> Defined in the original RECOVER study as follows: *young, short LOS (age < 42 yr and ICU LOS < 2 wk); mixed-age, variable LOS (age ≥ 42 yr and ICU LOS < 2 wk and age ≤ 45 yr and ICU LOS ≥ 2 wk); older, long LOS (age 46–66 and ICU LOS ≥ 2 wk); and oldest, long LOS (age >66 yr; ICU LOS ≥ 2 wk).*

*Abbreviations:* APACHE, acute physiology and chronic health evaluation; BMI, body mass index; DAAH<sub>90</sub>, days alive and at home at day 90; FIM, functional independence measure; GI, gastrointestinal; ICU, intensive care unit; MRC, medical research council; PaO<sub>2</sub>/FiO<sub>2</sub>, ratio of partial pressure of arterial oxygen to fraction of inspired oxygen

**eFigure 3.** Distribution of Days Alive and at Home at Day 90 (DAAH<sub>90</sub>) According to Disability Risk Groups Defined in the RECOVER Study

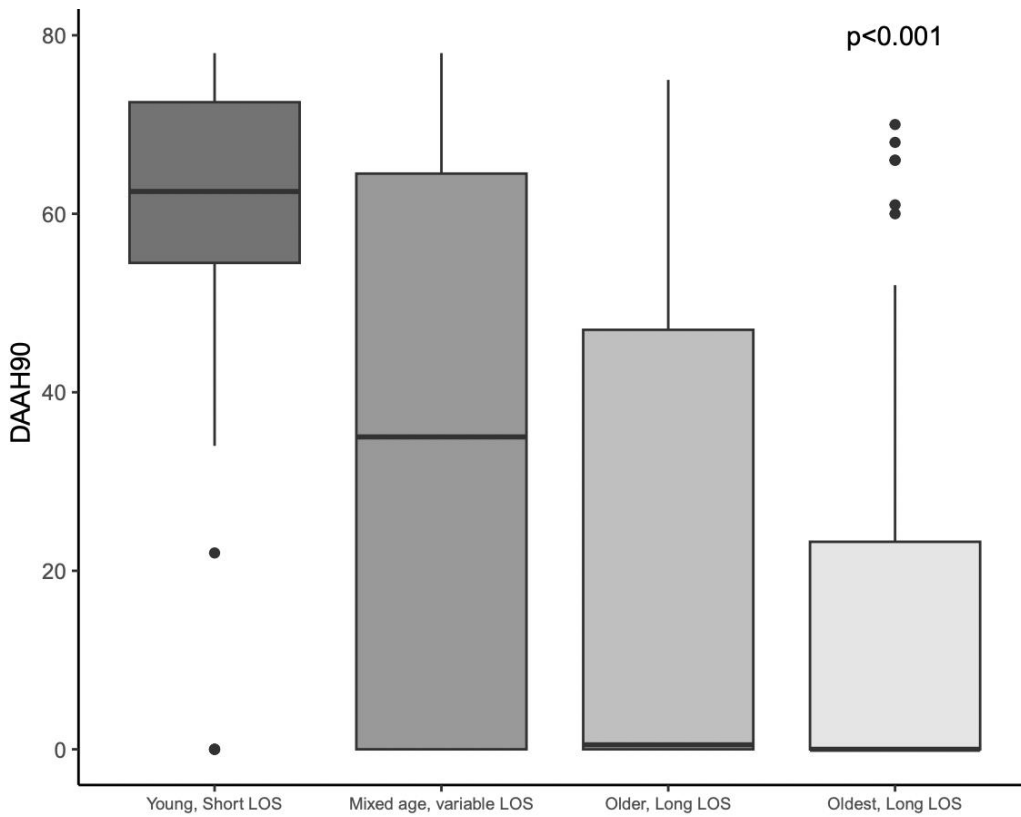

Disability risk groups were defined in the original study as follows: *young, short LOS* (age < 42 yr and ICU LOS < 2 wk); *mixed-age, variable LOS* (age ≥ 42 yr and ICU LOS < 2 wk and age ≤ 45 yr and ICU LOS ≥ 2 wk); *older, long LOS* (age 46–66 and ICU LOS ≥ 2 wk); and *oldest, long LOS* (age >66 yr; ICU LOS ≥ 2 wk). Boxplots were created using data from the baseline cohort.

*Abbreviations:* DAAH<sub>90</sub>, days alive and at home at day 90; LOS, length of stay



**eTable 3.** Adjusted Association of Composite Metrics With Functional Independence Measure Score at 1 Year

| Metric                                  | Estimate | 95% CI          | p-value         |
|-----------------------------------------|----------|-----------------|-----------------|
| <b>DAAH<sub>90</sub></b>                |          |                 |                 |
| DAAH <sub>90</sub> (2 <sup>nd</sup> )   | 12.5     | 5.0 – 20.0      | < <b>0.01</b>   |
| DAAH <sub>90</sub> (3 <sup>rd</sup> )   | 22.4     | 14.8 – 30.0     | < <b>0.0001</b> |
| Age                                     | -0.15    | -0.3 – 0.04     | 0.13            |
| Female sex                              | -8.5     | -14.7 – -2.2    | <0.01           |
| APACHE II score                         | 0.3      | -0.1 – 0.7      | 0.12            |
| Charlson score                          | 0.6      | -1.4 – 2.5      | 0.57            |
| <b>VFD<sub>28</sub></b>                 |          |                 |                 |
| VFD <sub>28</sub> (2 <sup>nd</sup> )    | 5.6      | -2.352 – 13.5   | 0.17            |
| VFD <sub>28</sub> (3 <sup>rd</sup> )    | 6.0      | -2.183 – 14.1   | 0.15            |
| Age                                     | -0.2     | -0.438 – -0.034 | 0.02            |
| Female sex                              | -8.9     | -15.6 – -2.2    | 0.01            |
| APACHE II score                         | 0.4      | -0.01 – 0.8     | 0.06            |
| Charlson score                          | 0.7      | -1.4 – 2.8      | 0.52            |
| <b>ICU-FD<sub>28</sub></b>              |          |                 |                 |
| ICU-FD <sub>28</sub> (2 <sup>nd</sup> ) | 0.4      | -7.6 – 8.4      | 0.93            |
| ICU-FD <sub>28</sub> (3 <sup>rd</sup> ) | 5.9      | -2.1 – 13.8     | 0.15            |
| Age                                     | -0.2     | -0.4 – -0.04    | 0.02            |
| Female sex                              | -8.9     | -15.6 – -2.1    | 0.01            |
| APACHE II score                         | 0.4      | -0.02 – 0.8     | 0.06            |
| Charlson score                          | 0.7      | -1.4 – 2.7      | 0.53            |

The adjusted associations between tertiles of each metric and FIM are quantified using linear regression. Data are reported for patients who survived to 3 months and who had FIM recorded at 1 year. Associations are reported against the first tertile (reference level) for each metric.

*Abbreviations:* APACHE, acute physiology and chronic health evaluation; DAAH<sub>90</sub> days alive and at home at day 90; FIM, functional independence measure; ICU-FD<sub>28</sub>, intensive care unit-free days at day 28; VFD<sub>28</sub>, ventilator-free days at day 28

**eTable 4. Sensitivity Analysis Removing Long-Term Care Length of Stay at Day 90**

| Characteristic                                   | Median (IQR)                                 |                                              |                                              | Unadjusted p-value | Adjusted p-value* |
|--------------------------------------------------|----------------------------------------------|----------------------------------------------|----------------------------------------------|--------------------|-------------------|
|                                                  | DAAH <sub>90</sub> (1 <sup>st</sup> tertile) | DAAH <sub>90</sub> (2 <sup>nd</sup> tertile) | DAAH <sub>90</sub> (3 <sup>rd</sup> tertile) |                    |                   |
| Number of patients with follow-up at 3 months, n | 98                                           | 97                                           | 97                                           |                    |                   |
| DAAH <sub>90</sub> (days), median [range]        | 0 [0, 1]                                     | 30 [2, 52]                                   | 65 [53, 78]                                  |                    |                   |
| Functional independence measure                  |                                              |                                              |                                              |                    |                   |
| 3 months                                         | 78 [44–102]                                  | 116 [101–121]                                | 121 [113–125]                                | <0.001             | 0.05              |
| 6 months                                         | 103 [66–116]                                 | 118.5 [110–123]                              | 122 [115–125]                                | <0.001             | 0.06              |
| 12 months                                        | 104 [92–118]                                 | 121 [108–125]                                | 123 [118–125]                                | <0.001             | <0.001            |
| 6-minute walk test                               |                                              |                                              |                                              |                    |                   |
| 3 months                                         | 100 [0–240]                                  | 320 [220–452]                                | 400 [300–496]                                | <0.001             | <0.001            |
| 6 months                                         | 264 [100–348]                                | 408 [294–490]                                | 436 [294–522]                                | <0.001             | <0.001            |
| 12 months                                        | 328 [151–417]                                | 408 [254–514]                                | 450 [372–545]                                | <0.001             | <0.001            |
| Medical research council score                   |                                              |                                              |                                              |                    |                   |
| 3 months                                         | 48 [33–54]                                   | 52 [48–58]                                   | 58 [51–60]                                   | <0.001             | <0.001            |
| 6 months                                         | 48 [44–58]                                   | 58 [48–60]                                   | 60 [54–60]                                   | <0.001             | <0.001            |
| 12 months                                        | 56 [48–60]                                   | 60 [52–60]                                   | 60 [58–60]                                   | <0.001             | <0.001            |
| SF-36 Physical Component Score                   |                                              |                                              |                                              |                    |                   |
| 3 months                                         | 30 [22–38]                                   | 33 [27–41]                                   | 37 [31–47]                                   | 0.001              | <0.001            |
| 6 months                                         | 30 [24–37]                                   | 37 [32–43]                                   | 40 [31–50]                                   | <0.001             | <0.001            |
| 12 months                                        | 33 [27–40]                                   | 40 [32–47]                                   | 41 [30–52]                                   | 0.001              | <0.001            |
| Impact Event Score                               |                                              |                                              |                                              |                    |                   |
| 3 months                                         | 15 [3–26]                                    | 12 [4–30]                                    | 18 [5–30]                                    | 0.61               | 0.91              |
| 6 months                                         | 12 [4–28]                                    | 15 [4–26]                                    | 13 [4–30]                                    | 0.83               | 0.61              |
| 12 months                                        | 14 [7–28]                                    | 11 [3–23]                                    | 10 [3–27]                                    | 0.27               | 0.19              |
| Beck Depression Inventory                        |                                              |                                              |                                              |                    |                   |
| 3 months                                         | 12 [7–22]                                    | 9 [6–16]                                     | 9 [6–16]                                     | 0.26               | 0.10              |
| 6 months                                         | 11 [5–18]                                    | 8 [4–12]                                     | 10 [4–19]                                    | 0.17               | 0.11              |
| 12 months                                        | 10 [6–18]                                    | 7 [4–13]                                     | 8 [2–17]                                     | 0.20               | 0.20              |
| One-year mortality, n (%)                        | 10 (10.2)                                    | 6 (5.8)                                      | 1 (1.1)                                      | 0.03               | 0.02              |

Abbreviations: DAAH<sub>90</sub>, days alive and at home at day 90; SF-36, Short Form-36

**eTable 5.** Cox Proportional Hazards Regression Model for 1-Year Mortality

|                                       | Adjusted hazard ratio (95% CI) | Adjusted p-value |
|---------------------------------------|--------------------------------|------------------|
| DAAH <sub>90</sub> (2 <sup>nd</sup> ) | 0.28 (0.12 – 0.64)             | <0.01            |
| DAAH <sub>90</sub> (3 <sup>rd</sup> ) | 0.18 (0.07 – 0.43)             | <0.001           |
| Age                                   | 1.02 (1.00 – 1.05)             | 0.10             |
| Female sex                            | 1.37 (0.73 – 2.57)             | 0.33             |
| APACHE II score                       | 0.97 (0.93 – 1.02)             | 0.24             |
| Charlson score                        | 1.42 (1.20 – 1.68)             | <0.001           |

The analysis was completed restricting to patients who were alive at day 90. Hazard ratios for DAAH<sub>90</sub> are reported against the first tertile (reference level).  
*Abbreviations:* APACHE, acute physiology and chronic health evaluation; DAAH<sub>90</sub>, days alive and at home at day 90

**eFigure 4.** Survival at 12 Months Among Survivors at Day 90 According to Tertiles of Days Alive and at Home at Day 90 Removing Long-Term Care Length of Stay

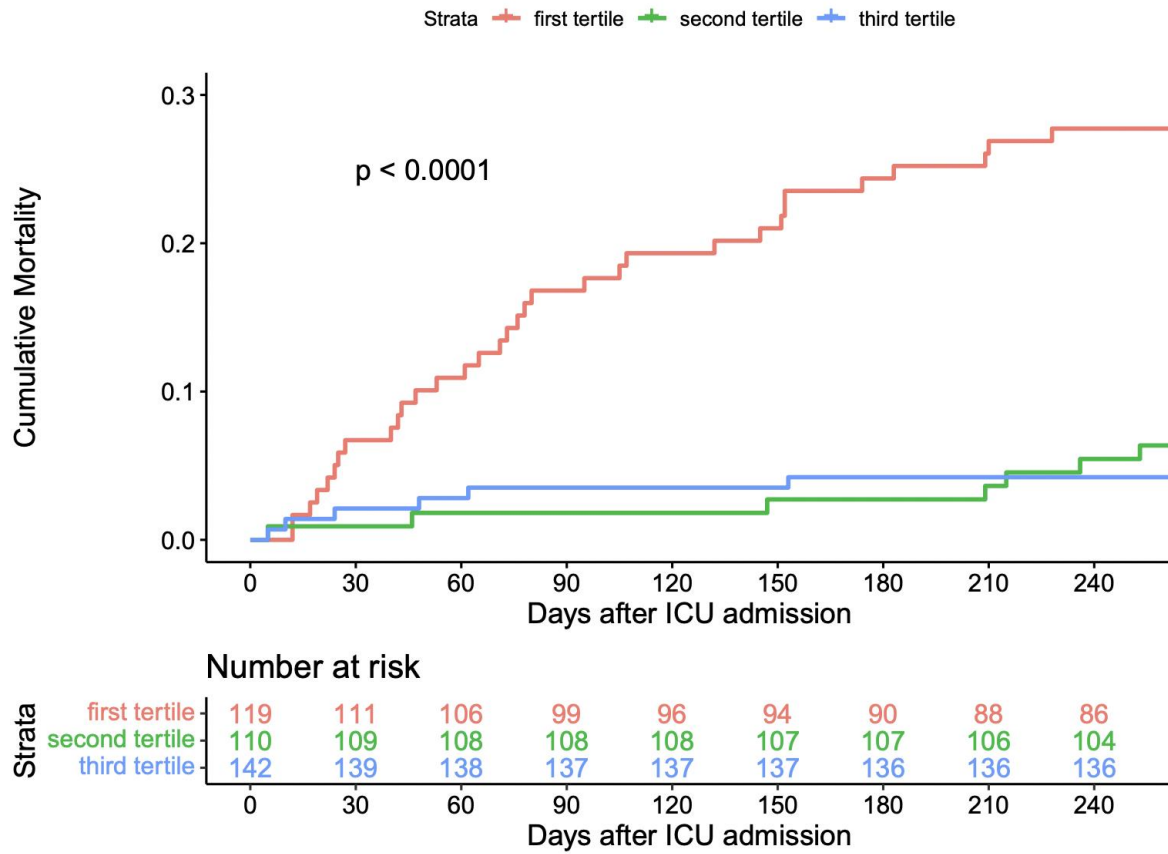

**eFigure 5.** Association of Deciles of Days Alive and at Home at Day 90 (DAAH<sub>90</sub>) With Functional Outcomes at 3 Months

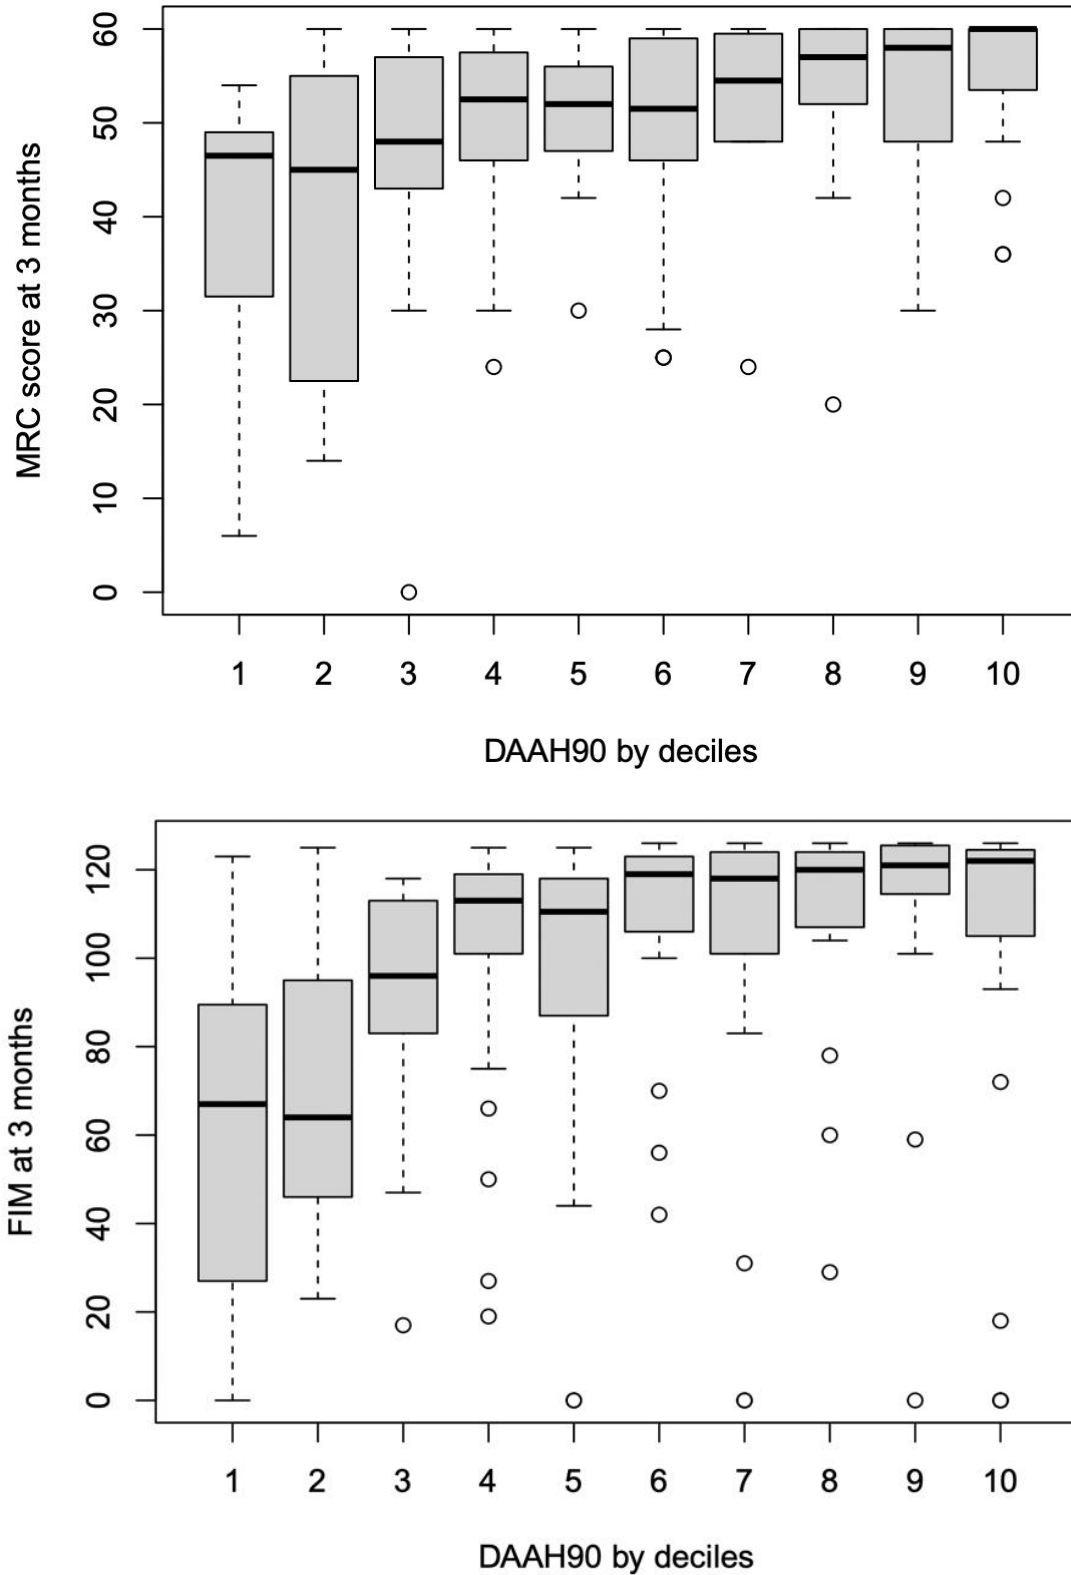

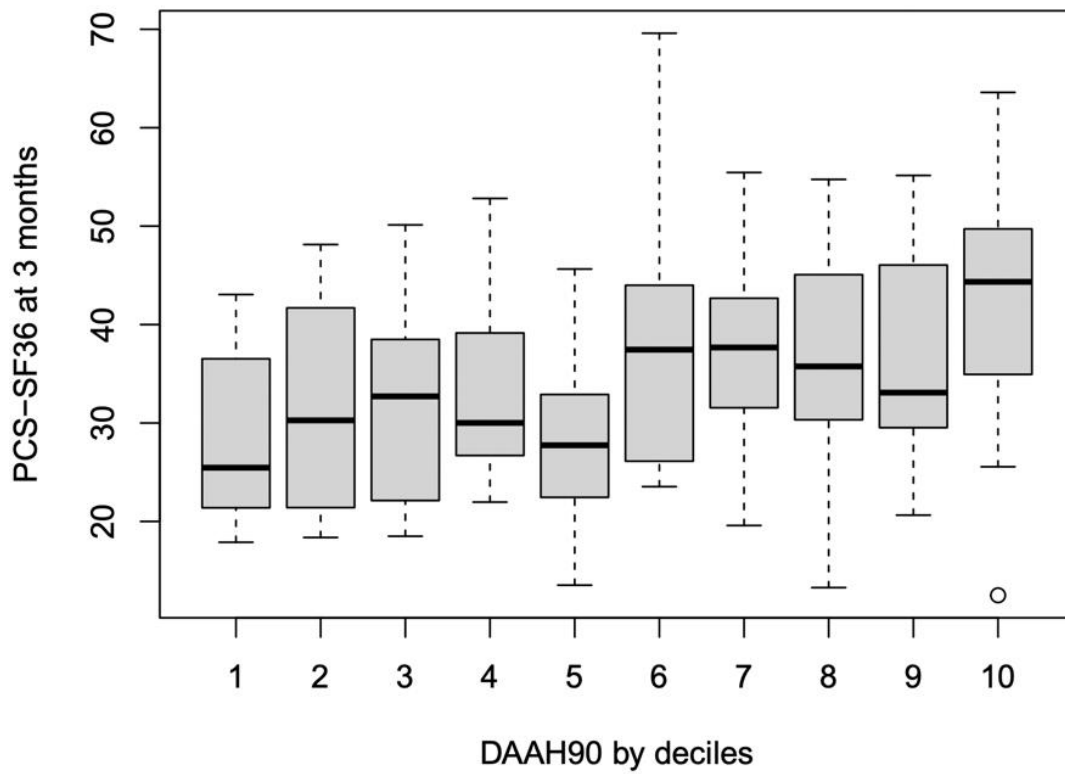

Values for each decile of DAAH<sub>90</sub> are as follows: 1<sup>st</sup> decile, 0; 2<sup>nd</sup> decile, 0; 3<sup>rd</sup> decile, 0; 4<sup>th</sup> decile, 0-16; 5<sup>th</sup> decile, 16-30; 6<sup>th</sup> decile, 31-46; 7<sup>th</sup> decile, 46-55; 8<sup>th</sup> decile, 56-63; 9<sup>th</sup> decile, 63-70; 10<sup>th</sup> decile, 70-78  
 Abbreviations: DAAH<sub>90</sub>, days alive and at home at day 90; FIM, functional independence measure; MRC, medical research council; PCS-SF36, physical component score of the Short Form-36

**eFigure 6.** Mortality at 1 Year in Survivors at Day 90 According to Deciles of Days Alive and at Home at Day 90 (DAAH<sub>90</sub>)

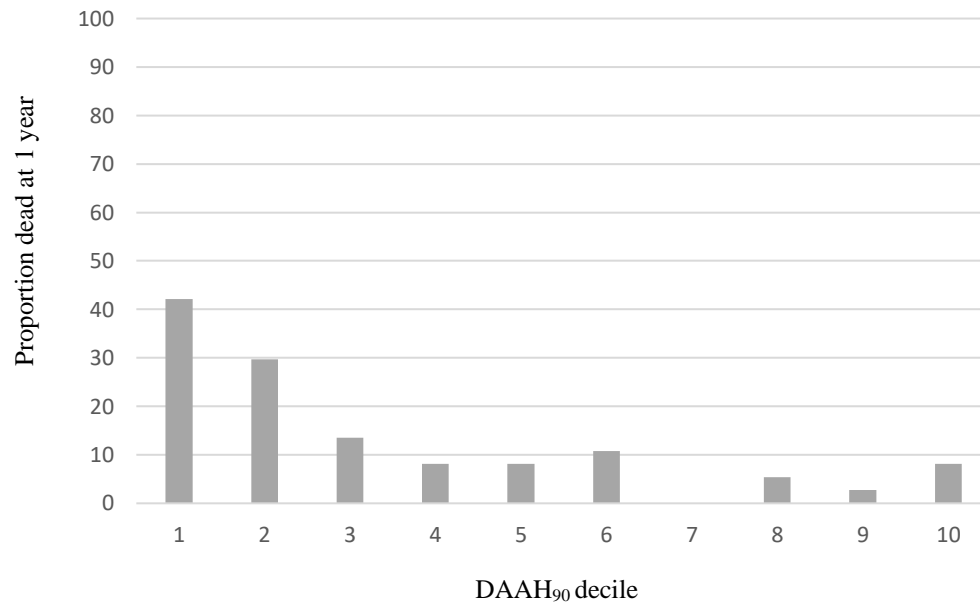

Values for each decile of DAAH<sub>90</sub> are as follows: 1<sup>st</sup> decile, 0; 2<sup>nd</sup> decile, 0; 3<sup>rd</sup> decile, 0; 4<sup>th</sup> decile, 0-16; 5<sup>th</sup> decile, 16-30; 6<sup>th</sup> decile, 31-46; 7<sup>th</sup> decile, 46-55; 8<sup>th</sup> decile, 56-63; 9<sup>th</sup> decile, 63-70; 10<sup>th</sup> decile, 70-78

Abbreviations: DAAH<sub>90</sub>, days alive and at home at day 90
