# Supplementary material for: Association of Days Alive and at Home at Day 90 After Intensive Care Unit Admission With Long-term Survival and Functional Status Among Mechanically Ventilated Patients
Source: PubMed Central journal article supplement (PMC10020882; doi:10.1001/jamanetworkopen.2023.3265), 2023-03-16
Supplement: jamanetwopen-e233265-s002.pdf [file jamanetwopen-e233265-s002.pdf]

## Data Sharing Statement

Taran. Association of Days Alive and at Home at Day 90 After Intensive Care Unit Admission With Long-term Survival and Functional Status Among Mechanically Ventilated Patients. *JAMA Netw Open*. Published March 16, 2023. doi:10.1001/jamanetworkopen.2023.3265

### Data

**Data available:** No
